1                                   **Microrisk Lab: an online freeware for predictive microbiology**

2                                   Yangtai Liu<sup>1</sup>, Xiang Wang<sup>1</sup>, Baolin Liu<sup>1\*</sup>, Qingli Dong<sup>1\*</sup>

3                                   <sup>1</sup> University of Shanghai for Science and Technology, Shanghai, China

4

5   \* Corresponding authors:

6   Baolin Liu

7   Mailing address: University of Shanghai for Science and Technology, 516 Jun Gong Rd.,

8   Shanghai 200093, China.

9   Tel.: +86-21-5527-0702

10   Email: [bliuk@163.com](mailto:bliuk@163.com)

11

12   Qingli Dong

13   Mailing address: University of Shanghai for Science and Technology, 516 Jun Gong Rd.,

14   Shanghai 200093, China.

15   Tel.: +86-21-5527-1117

16   Email: [dongqingli@126.com](mailto:dongqingli@126.com)

17

18 **Abstract**

19 Microrisk Lab was designed as an interactive modeling freeware to realize parameter  
20 estimation and model simulation in predictive microbiology. This tool was developed based  
21 on the R programming language and ‘Shinyapps.io’ server, and designed as a fully responsive  
22 interface to the internet-connected devices. A total of 36 peer-reviewed models were  
23 integrated for parameter estimation (including primary models of bacterial growth/  
24 inactivation under static and non-isothermal conditions, secondary models of specific growth  
25 rate, and competition models of two-flora growth) and model simulation (including integrated  
26 models of deterministic or stochastic bacterial growth/ inactivation under static and non-  
27 isothermal conditions) in Microrisk Lab. Each modeling section was designed to provide  
28 numerical and graphical results with comprehensive statistical indicators depending on the  
29 appropriate dataset and/ or parameter setting. In this research, six case studies were  
30 reproduced in Microrisk Lab and compared in parallel to DMFit, GInaFiT, IPMP 2013/  
31 GraphPad Prism, Bioinactivation FE, and @Risk, respectively. The estimated and simulated  
32 results demonstrated that the performance of Microrisk Lab was statistically equivalent to that  
33 of other existing modeling system in most cases. Microrisk Lab allowed for uniform user  
34 experience to implement microbial predictive modeling by its friendly interfaces, high-  
35 integration, and interconnectivity. It might become a useful tool for the microbial parameter  
36 determination and behavior simulation. Non-commercial users could freely access this  
37 application at <https://microrisklab.shinyapps.io/english/>.

38

39 **Keywords:** nonlinear regression; interactive interface; non-isothermal condition; stochastic

40 model.

## 41 List of symbols

|                                |                                                                                          |
|--------------------------------|------------------------------------------------------------------------------------------|
| $Y(t), Y_0, Y_{max}$           | the natural logarithm of real-time, initial, and maximum bacterial counts (ln CFU/g).    |
| $y(t), y_0, y_{max}$           | the 10-base logarithm of real-time, initial, and maximum bacterial counts (log10 CFU/g). |
| $y_{res}$                      | the 10-base logarithm of the residual bacterial counts (log10 CFU/g).                    |
| $\mu_{max}, \mu_{opt}$         | the maximum and optimal specific growth rate.                                            |
| $k_{max}$                      | the maximum specific inactivation rate.                                                  |
| $D$                            | the time of decimal reduction in inactivation.                                           |
| $D_{ref}$                      | the referenced decimal reduction time at $T_{ref}$ .                                     |
| $t_{lag}$                      | the time of lag in growth.                                                               |
| $S_l$                          | the time of shoulder (or before inactivation) in inactivation.                           |
| $t$                            | the time point.                                                                          |
| $t_{max}$                      | the time when entering the stationary phase in growth.                                   |
| $S_t$                          | the time when entering the stationary phase in inactivation.                             |
| $T, pH, aw$                    | The temperature (°C), pH, and water activity at $t$ .                                    |
| $T_{min}, T_{opt}, T_{max}$    | the minimum, optimal, and maximum growth temperature (°C).                               |
| $T_{ref}$                      | the referenced inactivation temperature (°C).                                            |
| $pH_{min}, pH_{opt}, pH_{max}$ | the minimum, optimal, and maximum growth pH.                                             |
| $aw_{min}, aw_{opt}, aw_{max}$ | the minimum, optimal, and maximum growth water activity.                                 |
| $q_0$                          | the initial physiological state of the inoculum in the Baranyi model.                    |
| $\delta, p$                    | the coefficients in the Weibull model.                                                   |
| $\delta_{ref}$                 | the referenced $\delta$ value at $T_{ref}$ .                                             |
| $a, b$                         | the coefficients in the square-root model.                                               |
| $A, m$                         | the coefficients in the dynamic Huang model.                                             |
| $z$                            | the coefficients of the bacterial thermal resistance (°C).                               |

42

## 43 **1. Introduction**

44 Foodborne pathogens have caused widespread food safety issues and potential severe  
45 risks nowadays (WHO, 2015). It is critical to understand and control the behavior (growth,  
46 survival or inactivation) or contaminated level of the focused microorganisms under different  
47 environmental conditions to ensure that foods are safe for consumption (Geeraerd,  
48 Valdramidis, & Van Impe, 2005; Augustin, 2011; González et al., 2018). For this reason,  
49 predictive microbiology has been developed as an efficient solution to estimate the bacterial  
50 concentration level in the perspective of mathematical modeling (Ross & McMeekin, 1994;  
51 Peleg & Corradini, 2011; Baranyi & Buss da Silva, 2017).

52 Microbiological predictive models are ordinarily classified as the primary model,  
53 secondary model, and tertiary model (Whiting & Buchanan, 1993). The primary model  
54 represents the relation between microbial concentrations and time under a specific condition  
55 by introducing the kinetic parameters, such as lag time, maximum specific growth/  
56 inactivation rate, and decimal reduction time. While the secondary model describes the  
57 influence of environmental conditions on the kinetic parameters, such as growth and  
58 inactivation rates. The tertiary model refers to the computer program that integrates validated  
59 pertinent information to characterize the situation or explain the trend of the microbial  
60 contamination level under a specific condition (Whiting & Buchanan, 1993). Commonly,  
61 regression (or fitting) should be firstly applied to obtain the kinetic parameter and the effect of  
62 environmental conditions in accordance with the experimental observation (e.g. maximum  
63 population density, growth boundaries, and decimal reduction time). After identifying and  
64 validating the characteristic of the target microorganism(s), microbial behaviors (e.g. growth,

65 inactivation, and survival) can be simulated under different conditions.

66 For realizing the parameter estimation, mathematical computing environments, such as R  
67 ([www.R-project.org](http://www.R-project.org)), MATLAB (The MathWorks, Inc., USA), and Python  
68 ([www.python.org](http://www.python.org)), are widely used in predictive microbiology. For example, ‘*nlsMicrobio*’  
69 (Baty & Delignette-Muller, 2015) and ‘*Bioinactivation*’ (Garre, Fernández, Lindqvist, &  
70 Egea, 2017) are two packages dedicated to obtaining the microbial kinetic parameters in the R  
71 environment. However, the requirement of specific coding skills may increase the learning  
72 burden during the modeling process. Thus, many useful interactive modeling systems were  
73 developed in the last decades (Huang, 2014/2017b; Tenenhaus-Aziza & Ellouze, 2015; Dolan,  
74 Habtegebriel, Valdramidis & Mishra, 2015; Koutsoumanis, Lianou, & Gougouli, 2016).  
75 Among the developed freeware, IPMP 2013/ Global Fit (Huang, 2014/2017b), desktop  
76 DMFit, GInaFiT (Geeraerd, Valdramidis, & Van Impe, 2005/ 2006) and PMM-Lab (Plaza-  
77 Rodriguez et al., 2015) provided numerical and graphical interfaces for users to obtain  
78 different microbial model parameters without coding. These tools required to be installed and  
79 run under the desktop system of Windows or Mac OS. The online free tools, namely, the  
80 online DMFit of ComBase ([www.combase.cc](http://www.combase.cc)) and Bioinactivation FE (Garre et al, 2018)  
81 could be easily accessed via different internet-connected devices, which provided the ability  
82 of cross-platform to users.

83 On the other hand, some modeling systems put more emphasis on simulating or  
84 predicting the bacterial concentration level under different environmental conditions, which  
85 have some reference significance to microbial risk assessment and management. As the well-  
86 known free tools, Pathogen Modeling Program (USDA, 2016), and ComBase Predictor

87 supported by their extensive microorganism-food database has been applied to predict the  
88 microbial behavior in culture medium or different food matrices. The applicability of a  
89 tertiary model is very dependent on the quantity and quality of the available knowledge  
90 integrated into the modeling system, such as experimental challenge test data, model types  
91 and associated model parameters. Recently, an updated application MicroHibro (González et  
92 al., 2018) allowed users to freely defined the model type and relevant parameter. This  
93 functionality may practically help users update the knowledge for the simulation when new  
94 evidence is observed. Meanwhile, it is also critical to take account of the uncertainty and  
95 variability of model parameters, especially in the application of the individual cell behavior  
96 modeling and risk assessment (Natau, 2001; Busschaert, Geeraerd, Uyttendaele, & Van Impe,  
97 2011; Cornu et al., 2011; Koutsoumanis & Lianou, 2013; Alonso, Molina, & Theodoropoulos,  
98 2014; Augustin et al., 2014). Thus, it is essential to introduce the stochastic approach in the  
99 prediction and simulation study.

100 Besides, much more complex situations should be considered to describe the microbial  
101 behavior in the real food chain, namely, the coexistence of multi-microorganisms, and the  
102 concentration change under dynamic conditions (Iannetti et al., 2017; Li, Huang, & Yuan,  
103 2017, Göransson, Nilsson, & Jevinger, 2018; Ndraha et al, 2018; Hwang & Huang, 2018). In  
104 non-isothermal modeling, free tools of ComBase Predictor, IPMP Dynamic Prediction  
105 (USDA, 2017), GroPIN (<https://www.aua.gr/psomas/gropin/>), FSSP (<http://fssp.food.dtu.dk>),  
106 and UGPM (Psomas, Nychas, Haroutounian, & Skandamis, 2011) were designed for  
107 microbial simulation. The web-based tool, Bioinactivation FE, was recently developed for  
108 fitting and simulating microbial inactivation under isothermal or non-isothermal conditions

109 (Garre et al, 2018). This tool exactly facilitated scientists handle different inactivation  
110 analyses without the need to code the mathematical models in a programming environment.  
111 However, there was still a lack of tools for kinetic analysis on the microbial dynamic growth  
112 (Tenenhaus-Aziza & Ellouze, 2015; Koutsoumanis, Lianou, & Gougouli, 2016). Hence, it  
113 may be helpful to design an integrated system containing the functionality for parameter  
114 estimation and model simulation under non-isothermal conditions.

115 This research introduced the main features of Microrisk Lab, an online modeling system  
116 integrating comprehensive microbial predictive models. Six case studies were implemented to  
117 describe a part of functionality and performance of this new application for parameter  
118 estimation and model simulation in predictive microbiology. The first version of Microrisk  
119 Lab was deployed on the ‘Shinyapps.io’ server, and available at  
120 <https://microrisklab.shinyapps.io/english/> (in English) and  
121 <https://microrisklab.shinyapps.io/chinese/> (in Chinese).

122

## 123 **2. Materials and methods**

### 124 **2.1. Design logic and programming basics of Microrisk Lab**

125 Microrisk Lab was designed as a R-based web application with a user-friendly interface  
126 for performing parameter estimation or model simulation studies in predictive microbiology.  
127 The coding language R, an open-source mathematical environment, could run on a wide  
128 variety of computer systems, including Windows, UNIX, and Mac OS. Several basic R  
129 packages, such as ‘*ggplot2*’ (Wickham et al., 2019), ‘*mc2d*’ (Pouillot & Delignette-Muller,  
130 2010), and ‘*Metrics*’ (Hamner, B., Frasco, M., & LeDell, E., 2018), were referenced in this



131 tool for mathematical and statistical analysis (see supplementary data). Meanwhile, the  
132 platform of ‘*Shiny*’ (<http://shiny.rstudio.com/>), *shinydashboard*’ (Chang & Borges Ribeiro,  
133 2019), and ‘*plotly*’ (<https://plot.ly>) were introduced to improve the operability and  
134 practicability of Microrisk Lab. The simple graphical user interface (GUI) and interactive  
135 output can automatically adapt to different screen sizes (Fig.1). Each section has a uniform  
136 interactive logic from left to right (horizontal view) or up to down (vertical view)  
137 corresponding to problem selection, condition setting, and result analysis. The observed  
138 measurement for parameter estimation or model simulation can be directly typed in the data  
139 dialog or pasted from other table files. After submitting all condition settings, users are free to  
140 make a real-time control on the interactive plot for better visualization then save as the local  
141 image file (Portable Network Frame file).

142 The structural framework of Microrisk lab is shown in Fig.2, which is basically divided  
143 into the ‘Estimation’ and ‘Simulation’ module. The ‘Estimation’ module was focused on  
144 determining the microbial parameters by the experimental observations under different  
145 conditions. The ‘Simulation’ module aimed to simulate the bacterial concentration changes  
146 under different temperatures by using different built-in predictive models.

147 In the ‘Estimation’ module, the least-squares method was implemented to search the  
148 optimized model parameter, which was conducted by the *nls* function in the ‘*stats*’ package.  
149 Both ‘NL2SOL’ algorithm (for the dynamic regression) and Gauss-Newton algorithm (for  
150 other regressions) were used in Microrisk Lab. If the fitting is successful, results of the fitted  
151 curve, parameter estimation, and model evaluation should be reported in the ‘Results Panel’.  
152 Meanwhile, the raw and generated datasets (observed, fitted, and simulated data) are

153 downloadable as 'csv.' files. Otherwise, a pop-up window would remind the user that  
154 regression is failure.

155 The 'Simulation' module in Microrisk Lab does not restrict the type of microorganisms  
156 or food. The microbial growth and inactivation should be simulated by defining the model  
157 type, microbial kinetic parameter, and temperature condition (or time-temperature profile).  
158 Besides, the stochastic simulation can be performed at static conditions. In this case,  
159 probability distribution of the parameter and condition are defined according to the mean  
160 value and standard deviation. Here, the duration of growth or inactivation steps is assumed as  
161 a Uniform distribution, and other default parameter settings are assumed as the Normal  
162 distribution. According to former researches (Baranyi, George, & Koutalik, 2009;  
163 Koutsoumanis & Lianou, 2013; Huang 2016), the LogNormal/ Gamma distribution and  
164 LogNormal/ Logistic distribution were additionally considered in the parameter setting of lag  
165 time (shoulder) and specific growth rate, respectively. Then the stochastic model can be  
166 conducted by using the simple sampling method with optional 100/1,000/10,000 iteration  
167 times for Monte-Carlo simulation.

168

## 169 **2.2. Mathematical models and statistical indicators in Microrisk Lab**

170 In version 1.0, Microrisk Lab contained 36 peer-reviewed models to implement  
171 parameter estimation or model simulation in predictive microbiology. Specifically, 20 explicit  
172 equations were chosen by considering different shapes of the growth/ inactivation curve for  
173 microbial dynamics under static conditions (Tab.1); 10 secondary models were selected in  
174 view of the impact of temperature/ pH/ water activity on the specific growth rate (Tab.2); 2

175 piecewise functions were applied to describe two flora competition growth (Tab.3); and 4  
176 groups of ordinary differential equations were presented by combining the primary model and  
177 secondary model for microbial growth/ inactivation under non-isothermal conditions (Tab.3).  
178 The definition of each parameter was illustrated in the list of symbols.

179 Note that the 2<sup>nd</sup> order Runge-Kutta method or Heun's method (Eq.1, Press, Teukolsky,  
180 Vetterling, & Flannery, 2007) was applied as the rapid numerical method to solve the ordinary  
181 differential equations in the dynamic kinetic analysis. During the computational procedures,  
182 the non-isothermal growth/ inactivation was firstly solved by the 2<sup>nd</sup> order Runge-Kutta  
183 method to calculate the predicted value, corresponding to each of the sampling time for  
184 bacterial counting. Then, the predicted values were applied to match the observed values by a  
185 nonlinear least-squares function to determine the optimized parameter estimation. Similar  
186 algorithm of the 4<sup>th</sup> order Runge-Kutta method was also realized by R and other programming  
187 languages in previous studies (Press, Teukolsky, Vetterling, & Flannery, 2007; Cattani et al.,  
188 2016; Li et al., 2017; Huang, 2017a; Hwang & Huang, 2018). The time step (0.1, 0.01, or  
189 0.001) could be selected by the user in the regression of non-isothermal growth and  
190 inactivation.

$$191 \quad \begin{cases} Y_{n+1} = Y_n + \frac{h}{4}(k_1 + 3k_2) \\ k_1 = f(t_n, Y_n) \\ k_2 = f\left(t_n + \frac{2h}{3}, Y_n + \frac{2h}{3}k_1\right) \end{cases} \quad \text{Eq.1}$$

192 In the module of parameter estimation, a recognition algorithm (if/ else statement) was  
193 preset to transfer the input (counting) data into the appropriate unite before fitting to a specific  
194 model, which allowed users to freely choose the preferred input unit of the counting data  
195 ("Log10 CFU/g or CFU/ml", "Ln CFU/g or CFU/ml", or "CFU/g or CFU/ml") in Microrisk

196 Lab. Meanwhile, results of the model parameter, the estimated value, standard error, and  
197 lower and upper 95% confidence intervals (Eq.2), were provided by the R package of “stats”  
198 and “nlstool”. After obtaining the estimated and evaluated values, users could select the  
199 decimal digits (0, 1, 2, 3, or 4) of the generated results, which should be determined according  
200 to the unit precision of the parameter.

$$\begin{cases} \text{L95\%CI} = \hat{\beta} - t_{95\%,df} \cdot \text{MSE} \cdot \hat{B} \\ \text{U95\%CI} = \hat{\beta} + t_{95\%,df} \cdot \text{MSE} \cdot \hat{B} \\ t_{95\%,df} = t_{95\%,\infty} \approx 1.96 \end{cases} \quad \text{Eq. 2}$$

202 where  $\hat{\beta}$  is the estimated parameter; MSE is the mean sum of square error;  $\hat{B}$  is the  
203 inverse of the matrix of second derivatives of the log-likelihood function as a function of  $\beta$   
204 evaluated at the parameter estimates  $\beta = \hat{\beta}$ ; df is degrees of freedom, which is assumed  
205 infinite;  $t_{95\%,df}$  is the value from the t distribution for 95% confidence for the specified  
206 number of df.

207 Furthermore, several statistical indicators were reported to evaluate and compare the  
208 goodness-of-fit between observed and predicted values, such as the residual sum of squares  
209 (RSS, Eq.3, Draper & Smith, 1998), mean sum of squared error (MSE, Eq.4, Geeraerd et al.,  
210 2005), root mean sum of squared error (RMSE, Eq.5, Ratkowsky, 2003), regular Akaike  
211 information criterion (AIC, Eq.6, Akaike, 1974), corrected AIC (AICc, Eq.7, Burnham &  
212 Anderson, 2003) and Bayesian information criterions (BIC, Eq.8, Schwarz, 1978). As pointed  
213 out by Ratkowsky (2003), the coefficient of determination ( $R^2$ , Eq.9, Rawlings, Pantula, &  
214 Dickey, 2001) and the adjusted coefficient of determination (Adjusted  $R^2$ , Eq.10, Rawlings,  
215 Pantula, & Dickey, 2001) might be inappropriate to evaluate the non-linear models. Thus,  
216 Microrisk Lab provided these two indicators only for linear models.

$$217 \quad \text{RSS} = \sum_{i=1}^n (y_i - \hat{y}_i)^2 \quad \text{Eq.3}$$

218 
$$\text{MSE} = \frac{\text{RSS}}{n} \quad \text{Eq.4}$$

219 
$$\text{RMSE} = \sqrt{\text{MSE}} \quad \text{Eq.5}$$

220 
$$\text{AIC} = -2 \log(\hat{\theta}) + 2k \quad \text{Eq.6}$$

221 
$$\text{AIC}_c = \text{AIC} + \frac{2k(k+1)}{n-k-1} \quad \text{Eq.7}$$

222 
$$\text{BIC} = -2 \log(\hat{\theta}) + k \ln(n) \quad \text{Eq.8}$$

223 
$$R^2 = \frac{\sum_{i=1}^n (\hat{y}_i - \frac{1}{n} \sum_{i=1}^n y_i)^2}{\sum_{i=1}^n (y_i - \frac{1}{n} \sum_{i=1}^n y_i)^2} \quad \text{Eq.9}$$

224 
$$\text{Adjusted } R^2 = 1 - (1 - R^2) \frac{n-1}{n-k-1} \quad \text{Eq.10}$$

225 where  $y_i$  is the  $i$  th value of the observation;  $\hat{y}_i$  is the  $i$  th value of the prediction;  $k$  is  
226 the number of parameters; and  $n$  is the number of sample data;  $\log(\hat{\theta})$  is the numerical  
227 value of the log-likelihood for the fitted model (the probability of the data given a model in  
228 the model), which is donated by the **logLik()** function built in the R package ‘stats’.

229 Besides, for stochastic simulation, the Pearson correlation coefficient (Eq.11) is also  
230 calculated to measure the linear correlation between different model variables ( $\mathbf{P}$ ) and the  
231 final bacterial concentration ( $y_{final}$ ). The dependence or association relationship can be  
232 measured by the generated tornado plot.

233 
$$\rho_{X,Y} = \frac{\text{cov}(X, y_{final})}{\sigma_X \sigma_{y_{final}}} \quad \text{Eq.11}$$

234 where  $\text{cov}(X, y_{final})$  is the covariance of the final bacterial concentration and different  
235 model variables;  $\sigma_X$  is the standard deviation of different model variables;  $\sigma_{y_{final}}$  is the  
236 standard deviation of the final bacterial concentration.

237

### 238 **2.3. Practical examples for Microrisk Lab**

239 To illustrate the performance of Microrisk Lab, we collected 6 datasets from the peer-

240 reviewed papers and lab observation for parameter estimation and simulation. Specifically,  
241 the study on the static/ non-isothermal growth regression, static/ non-isothermal inactivation  
242 regression, secondary model regression, and static stochastic growth simulation. The datasets  
243 for the kinetic analyses (Case I – V) were attached in the supplementary data. It should be  
244 noted that only a part of models was compared with the relevant modeling system in this  
245 study. More results on the comparison between built-in models were provided in the user  
246 manual (see supplementary data).

247 2.3.1. Case I – Kinetic analysis of *Listeria monocytogenes*/ *Listeria innocua* growth under a  
248 static condition

249 A growth measurement of *L. monocytogenes*/ *L. innocua* in tryptose phosphate broth  
250 (TPB) was obtained from the ComBase browser (ComBase ID: LM127\_11) according to the  
251 research of Buchanan & Phillips (1990). In order to compare with the online DMFit and Excel  
252 DMFit, the ‘Complete Baranyi model’ in Microrisk Lab was chosen to determine the kinetic  
253 parameter of *L. monocytogenes*.

254 2.3.2. Case II – Kinetic analysis of *Salmonella enterica* inactivation under a static condition

255 A thermal inactivation curve of *S. enterica* in Brain Heart Infusion (BHI) under 60°C  
256 reported by Wang, Devlieghere, Geeraerd, & Uyttendaele (2017) was used to evaluate the  
257 inactivation model in Microrisk Lab. According to the suggestion by the author, ‘Log-linear +  
258 Shoulder’ model in GInaFiT (version 1.7) was selected for fitting. Therefore, performance of  
259 ‘No tail Geeraerd model’ in Microrisk Lab was compared in parallel with GInaFiT as well.

260 2.3.3. Case III– Effect of temperature on the specific growth rate of *Salmonella* Typhimurium

261 We cited a study on the maximum specific growth rate of *S. Typhimurium* (ATCC

262 14028) in chicken breast (Oscar, 2002) to estimate the growth boundary and optimal  
263 parameter by fitting the cardinal parameters model. The value of the specific growth rate  
264 under different static temperature conditions was converted to the same units (natural  
265 logarithm) in Microrisk Lab before regression. Both IPMP 2013 and Prism (version 7.0,  
266 GraphPad Software, USA) were applied for comparison.

267 2.3.4. Case IV – Kinetic analysis of *L. monocytogenes* growth under non-isothermal  
268 conditions

269 For growth modeling under non-isothermal conditions, the observed concentration and  
270 time-temperature profile were introduced from a study on *L. monocytogenes* growth in  
271 cooked beef samples under non-isothermal conditions. During the experiments, four *L.*  
272 *monocytogenes* strains (serotype 1/2a, 1/2b, 1/2c and 4b, meat isolated) were inoculated in a  
273 heat-treated ready-to-eat braised beef product (ca. 1% NaCl, pH=6.2, aw=0.983) and  
274 incubated in an air-packaged sterile stomacher bag under the fluctuating temperature ranging  
275 from 5 to 40°C. To date, there were no other integrated systems specialized for non-isothermal  
276 growth regression analysis. Thus, the measurements would be fitted by the ‘Baranyi-Cardinal  
277 parameter model’ and ‘Huang-Cardinal parameter model’ in Microrisk Lab.

278 2.3.5. Case V – Kinetic analysis of *Bacillus sporothermodurans* IC4 spores  
279 inactivation under non-isothermal conditions

280 In this case, a dataset was adopted from the supplementary data of the verification  
281 research on the non-isothermal inactivation modeling by Bioinactivation core (Garre,  
282 Fernández, Lindqvist, & Egea, 2017). This example data described the inactivation of *B.*  
283 *sporothermodurans* IC4 spores under non-isothermal heating conditions. Bioinactivation FE

284 (Garre et al, 2018), a web tool based on Bioinactivation core, was introduced to compare for  
285 the estimated results with Microrisk Lab. The dynamic Bigelow model was selected with the  
286 non-linear regression algorithm for inactivation fitting under non-isothermal conditions.

#### 287 2.3.6. Case VI – Simulation of *S. Typhimurium* stochastic growth under a static condition

288 The stochastic simulation was based on the study of Koutsoumanis & Lianou (2013)  
289 which obtained the growth parameters of *S. Typhimurium* individual cells with an automated  
290 time-lapse microscopy method. A 10,000 times Monte-Carlo simulation was realized in  
291 commercial software, @Risk for Excel (version 6.0, Palisade Corporation, USA), to describe  
292 the stochastic growth of *S. Typhimurium* individual cells. According to the distribution of the  
293 conditions and parameters, the stochastic growth of a single cell with the Buchanan model  
294 was reproduced in Microrisk Lab for comparison.

295

### 296 **3. Results and discussion**

#### 297 **3.1. Comparison of the primary and secondary modeling**

298 Case studies of the growth/ static inactivation under static conditions and the effect of  
299 temperature on the specific growth rate were evaluated in Microrisk Lab and compared with  
300 other integrated modeling systems. The fitted curves of Case I, Case II, and Case III  
301 downloaded from Microrisk Lab are shown in Fig.3, which illustrates the consistency in the  
302 result rendering of different sections. Note that the interactivity of Microrisk Lab allows users  
303 to change the coordinate axis settings and the displayed results freely.

304 Tab.4 lists the results of the estimation and evaluation in Microrisk Lab and DMFit by  
305 fitting the complete Baranyi model for Case I. Although most of the estimated results were



306 similar, there was around four-hour distinction between Online DMFit and Microrisk Lab/  
307 Excel DMFit on the estimated lag time. It should be noted that, in the DMFit systems, two  
308 curvature parameters of model need to be determined and fixed before regression. According  
309 to the help documentation for Online DMFit ([https://browser.combase.cc/DMFit\\_Help.aspx](https://browser.combase.cc/DMFit_Help.aspx))  
310 and manual for Excel DMFit (version 3.5), the default values for two curvature parameters,  
311 nCurv and mCurv, were 1 and 10, respectively. In contrast, all estimable parameters were  
312 determined by globally searching for the optimized estimates in Microrisk Lab, which could  
313 also cause the discrepancy of results. The evaluation indicators and standard errors of  
314 parameters are getting close to that in Microrisk Lab when increasing the value of nCurv from  
315 default 1 to 2 in Excel DMFit. However, it is noticeable that the reason for differences of the  
316 estimated value between the online DMFit and Excel DMFit is inexplicable. Meanwhile, the  
317 model evaluation indicators were different in DMFit tools and Microrisk Lab, we further  
318 calculated adjusted  $R^2$  by Eq.8 according to the regression in Microrisk Lab for comparison  
319 (Tab.4). The results illustrate that the estimated adjusted  $R^2$  has no obvious differences  
320 between Microrisk Lab and DMFit tools with different curvature settings.

321 As listed in Tab.5, for the static inactivation modeling, results of estimated parameters  
322 and evaluation indicators show no difference between Microrisk Lab and GInaFiT 1.7 when  
323 using the same model. Similarly, the effect of temperature on the  $\mu_{max}$  of *S. Typhimurium* in  
324 chicken breast has been equivalently described in Microrisk Lab, IPMP 2013, and GraphPad  
325 Prism by the cardinal parameters model (Tab.6). Remember that the equation of AIC built-in  
326 IPMP 2013 was referred to the study by van Boekel, & Zwietering (2007), which was  
327 different from that of built-in Microrisk Lab. Above results indicated that Microrisk Lab could

328 offer an equivalent accuracy to other integrated systems on primary and secondary modeling  
329 studies.

### 330 **3.2. Comparison of the dynamic modeling**

331 In Case IV, both time-temperature profile and bacterial counting data were needed for the  
332 dynamic analysis. Initial guesses of the model parameter were required to assist in regression  
333 converge easily. According to former studies (ICMSF, 1996; Magalhães et al., 2014), *L.*  
334 *monocytogenes* probably has a growth temperature range from 0 to 45°C, the optimal specific  
335 growth rate is around 1ln CFU/h (or 1/h) under 37°C in meat products. Initial guesses  
336 (Default values) of  $q_0$ ,  $A$ , and  $m$  are preset as 1 in Microrisk Lab when there has no reliable  
337 basic knowledge on these parameters. With the above initial settings, both regressions could  
338 converge successfully. The fitted curve and the estimated result are exhibited in Fig.4 and  
339 Tab.7, respectively. The results illustrated that the microbial growth parameters could be  
340 obtained from Microrisk Lab with the measurements under non-isothermal conditions in one  
341 analysis. Meanwhile, the Baranyi - Cardinal parameter model and Huang - Cardinal parameter  
342 model could well describe the non-isothermal growth of *L. monocytogenes* in cooked beef.

343 Similarly, with the microbial enumeration data and time-temperature profile in Case V,  
344 the non-isothermal inactivation fitting could be performed in Microrisk Lab (Fig. 5). Initial  
345 guesses of the estimable parameters were quoted from the primary study and listed in Tab.8,  
346 where the referenced temperature was fixed to 120°C (Garre, Fernández, Lindqvist, & Egea,  
347 2017). As illustrated in Tab.8, the obtained estimations of Microrisk Lab are close to that of  
348 Bioinactivation FE. It should be noted, however, that numerical methods for the ordinary  
349 differential equations were different in these two tools. The **LSODA** solver in R package

350 'deSolve' (Soetaert, Petzoldt & Setzer, 2010) was introduced in Bioinactivation series to  
351 conduct the predictor-corrector method or backward differentiation formulae method for the  
352 dynamic model. In contrast, the Runge-Kutta method was provided by Microrisk Lab. These  
353 numerical methods have their own advantages and disadvantages respectively, but the choice  
354 might cause different truncation errors in a regression (Butcher, 2016). Thus, it is  
355 recommended to take care when using the evaluation indicators of AIC, AICc, and BIC  
356 provided from different modeling platforms for model comparison.

### 357 **3.3. Comparison of the stochastic growth simulation**

358 The stochastic type model is possible to be applied to the static simulation in Microrisk  
359 Lab by defining the distribution of different model variables. As previously mentioned, the  
360 behavior of microorganisms may be quite different when the population size decreases to the  
361 single-cell level. It is thus necessary to consider the uncertainty and variability of the cells  
362 during the simulation. In the referenced study of Case VI, Koutsoumanis & Lianou (2013)  
363 described the growth of the *S. Typhimurium* at the different single-cell level by establishing a  
364 stochastic model. Depending on the condition for the software of @Risk for Excel, the  
365 parameter setting of Microrisk Lab was listed in Tab.9, and the simulated results are presented  
366 in Fig.6(A). The probability distribution of the specific growth rate and the final bacterial  
367 concentration is provided with the mean value and standard deviation in Fig 6(C). According  
368 to the definition of the coefficient of variation ( $\%CV = 100 \times \text{standard deviation} / \text{mean}$ ) in the  
369 original study, the estimated %CV for *S. Typhimurium* final concentration is also around  
370 25.5% in Microrisk Lab. The above result demonstrates that Microrisk Lab can perform a  
371 Monte-Carlo simulation for bacterial stochastic modeling. Moreover, Fig 6(D) shows the

372 tornado graph of the sensitivity analysis on bacterial counts obtained by different associated  
373 parameters. Thus, restricted by the above settings, the uncertainty of the duration of growth  
374 time has a relatively higher impact (than other variables) on the bacterial count during the  
375 stochastic growth of *S. Typhimurium* single cell.

376 From the above cases, Microrisk Lab can be easily applied in microbial predictive  
377 modeling, however, functionalities should be improved to handle more practical modeling  
378 tasks. The model applicability could be expanded, for example, paying more attention to the  
379 impact of the interaction between different intrinsic or extrinsic factors on the microorganism.  
380 Algorithms involved in regression and simulation are also deserved to be developed for more  
381 options. Bioinactivation FE provides a good example for containing different fitting  
382 algorithms, while the functionality of fixed parameter could help users decide the estimable  
383 parameter (Garre et al, 2018). Meanwhile, Latin Hypercube sampling is a widely used method  
384 for the Monte-Carlo simulation in qualitative microbiological risk assessments (Ding et al.,  
385 2013; Membré & Boué, 2017; Dogan, Clarke, Mattos & Wang, 2019), which should be  
386 considered in our future update to improve the sampling efficiency.

387

#### 388 **4. Conclusions**

389 In this study, a web-based freeware, Mirrorisk Lab, was introduced and used to validate  
390 its performance limited regression and simulation analysis in predictive microbiology. The  
391 interactive interface and simple manipulation logic help users readily obtain the modeling  
392 results. Practical examples elucidated that, in most cases, there was no statistical difference  
393 between the results obtained from Microrisk Lab and other existing modeling systems (except

394 the online DMFit) in both regression and simulation studies. The new tool could provide more  
395 statistical results for the estimated parameter or evaluated indicator. Besides, it was also easy  
396 to perform the growth kinetic analysis under non-isothermal conditions without any coding  
397 skill in Microrisk Lab. This freeware might serve as a useful modeling tool and relevant  
398 educational resource for predictive modeling in microbiology.  
399

400 **Supplementary data**

401 Supplementary data to this article is available.

402

403 **Acknowledgments**

404 This work was supported by the National Key Research and Development Program of China

405 (Grant No. 2019YFE0103800). We would like to thank Dr. Lihan Huang in the Eastern

406 Regional Research Center of USDA, USA, for his helpful guidance on the R programming.

407

408 **Reference**

409 Akaike, H. (1974). A new look at the statistical model identification. *IEEE Transactions on*

410 *Automatic Control*, 19(6), 716–723. <http://doi.org/10.1109/TAC.1974.1100705>

411 Albert, I., & Mafart, P. (2005). A modified Weibull model for bacterial inactivation.

412 *International Journal of Food Microbiology*, 100(1-3), 197–211.

413 <http://doi.org/10.1016/j.ijfoodmicro.2004.10.016>

414 Alonso, A. A., Molina, I., & Theodoropoulos, C. (2014). Modeling bacterial population

415 growth from stochastic single-cell dynamics. *Applied and Environmental Microbiology*,

416 80(17), 5241–5253. <http://doi.org/10.1128/AEM.01423-14>

417 Augustin, J.-C. (2011). Challenges in risk assessment and predictive microbiology of

418 foodborne spore-forming bacteria. *Food Microbiology*, 28(2), 209–213.

419 <http://doi.org/10.1016/j.fm.2010.05.003>

420 Augustin, J.-C., Ferrier, R., Hezard, B., Lintz, A., & Stahl, V. (2015). Comparison of

421 individual-based modeling and population approaches for prediction of foodborne

422 pathogens growth. *Food Microbiology*, 45, 205–215.

423 <http://doi.org/10.1016/j.fm.2014.04.006>

424 Baranyi, J., & Buss da Silva, N. (2017). The use of predictive models to optimize risk of

425 decisions. *International Journal of Food Microbiology*, 240, 19–23.

426 <http://doi.org/10.1016/j.ijfoodmicro.2016.10.016>

427 Baranyi, J., & Roberts, T. A. (1995). Mathematics of predictive food microbiology.

428 *International Journal of Food Microbiology*, 26(2), 199–218.

429 Baranyi, J., George, S. M., & Kutalik, Z. (2009). Parameter estimation for the distribution of



- 430 single cell lag times. *Journal of Theoretical Biology*, 259(1), 24–30.
- 431 <http://doi.org/10.1016/j.jtbi.2009.03.023>
- 432 Baty, F., & Delignette-Muller, M.-L. (2015). *nlsMicrobio*: Nonlinear regression in predictive  
433 microbiology. *R package version 0.0-1*. Available at: [www.r-project.org](http://www.r-project.org).
- 434 Bigelow, W. D. (1921). The logarithmic nature of thermal death time curves. *Journal of*  
435 *Infectious Diseases*, 29(5), 528–536. <http://doi.org/10.1093/infdis/29.5.528>
- 436 Buchanan, R. L., & Golden, M. H. (1995). Model for the non-thermal inactivation of *Listeria*  
437 *monocytogenes* in a reduced oxygen environment. *Food Microbiology*, 12, 203–212.  
438 [http://doi.org/10.1016/S0740-0020\(95\)80099-9](http://doi.org/10.1016/S0740-0020(95)80099-9)
- 439 Buchanan, R. L., & Phillips, J. G. (1990). Response surface model for predicting the effects  
440 of temperature pH, sodium chloride content, sodium nitrite concentration and atmosphere  
441 on the growth of *Listeria monocytogenes*. *Journal of Food Protection*, 53(5), 370–376.  
442 <http://doi.org/10.4315/0362-028x-53.5.370>
- 443 Buchanan, R. L., Whiting, R. C., & Damert, W. C. (1997). When is simple good enough: a  
444 comparison of the Gompertz, Baranyi, and three-phase linear models for fitting bacterial  
445 growth curves. *Food Microbiology*, 14(4), 313–326.  
446 <http://doi.org/10.1006/fmic.1997.0125>
- 447 Burnham, K. P., & Anderson, D. R. (2003). *Model Selection and Multimodel Inference*.  
448 Springer Science & Business Media.
- 449 Busschaert, P., Geeraerd, A. H., Uyttendaele, M., & Van Impe, J. F. (2011). Sensitivity  
450 analysis of a two-dimensional quantitative microbiological risk assessment: Keeping  
451 variability and uncertainty separated. *Risk Analysis*, 31(8), 1295–1307.

- 452 <http://doi.org/10.1111/j.1539-6924.2011.01592.x>
- 453 Butcher, J. C. (2016). *Numerical methods for ordinary differential equations (Third edition)*.  
454 New York: Wiley.
- 455 Cattani, F., Dolan, K. D., Oliveira, S. D., Mishra, D. K., Ferreira, C. A. S., Periago, P. M., et  
456 al. (2016). One-step global parameter estimation of kinetic inactivation parameters for  
457 *Bacillus sporothermodurans* spores under static and dynamic thermal processes. *Food*  
458 *Research International*, 89(1), 614–619. <http://doi.org/10.1016/j.foodres.2016.08.027>
- 459 Chang, W., & Borges Ribeiro, B. (2019). *shinydashboard*: create dashboards with 'Shiny'. *R*  
460 *package version 0.7.1*. Available at: [www.r-project.org](http://www.r-project.org).
- 461 Cornu, M., Billoir, E., Bergis, H., Beaufort, A., & Zuliani, V. (2011). Modeling microbial  
462 competition in food: Application to the behavior of *Listeria monocytogenes* and lactic  
463 acid flora in pork meat products. *Food Microbiology*, 28(4), 639–647.  
464 <http://doi.org/10.1016/j.fm.2010.08.007>
- 465 Ding, T., Iwahori, J., Kasuga, F., Wang, J., Forghani, F., Park, M.-S., & Oh, D.-H. (2013).  
466 Risk assessment for *Listeria monocytogenes* on lettuce from farm to table in Korea. *Food*  
467 *Control*, 30(1), 190–199. <http://doi.org/10.1016/j.foodcont.2012.07.014>
- 468 Dogan, O. B., Clarke, J., Mattos, F., & Wang, B. (2019). A quantitative microbial risk  
469 assessment model of *Campylobacter* in broiler chickens: Evaluating processing  
470 interventions. *Food Control*, 100, 97–110. <http://doi.org/10.1016/j.foodcont.2019.01.003>
- 471 Dolan, K., Habtegebriel, H., Valdramidis V.P., & Mishra, D. (2015). Thermal processing and  
472 kinetic modeling of inactivation. In: Bakalis, S., Knoerzer, K., & Fryer, P.J. (Eds.),  
473 *Modeling Food Processing Operations* (pp. 37-66). Woodhead Publishing.
- 474 Draper, N. R., & Smith, H. (1998). *Applied regression analysis*. John Wiley & Sons.

- 475 Garre, A., Clemente-Carazo, M., Fernández, P. S., Lindqvist, R., & Egea, J. A. (2018).  
476 Bioinactivation FE: A free web application for modelling static and dynamic microbial  
477 inactivation. *Food Research International*, *112*, 353–360.  
478 <http://doi.org/10.1016/j.foodres.2018.06.057>
- 479 Garre, A., Fernández, P. S., Lindqvist, R., & Egea, J. A. (2017). Bioinactivation: Software for  
480 modelling dynamic microbial inactivation. *Food Research International*, *93*, 66–74.  
481 <http://doi.org/10.1016/j.foodres.2017.01.012>
- 482 Geeraerd, A. H., Herremans, C. H., & Van Impe, J. F. (2000). Structural model requirements  
483 to describe microbial inactivation during a mild heat treatment. *International Journal of*  
484 *Food Microbiology*, *59*(3), 185–209.
- 485 Geeraerd, A. H., Valdramidis, V. P., & Van Impe, J. F. (2005). GInaFiT, a freeware tool to  
486 assess non-log-linear microbial survivor curves. *International Journal of Food*  
487 *Microbiology*, *102*(1), 95–105. <http://doi.org/10.1016/j.ijfoodmicro.2004.11.038>
- 488 Geeraerd, A. H., Valdramidis, V. P., & Van Impe, J. F. (2006). Erratum to “GInaFiT, a  
489 freeware tool to assess non-log-linear microbial survivor curves” [Int. J. Food Microbiol.  
490 *102* (2005) 95–105]. *International Journal of Food Microbiology*, *110*(3), 297–1.  
491 <http://doi.org/10.1016/j.ijfoodmicro.2006.04.002>
- 492 González, S. C., Possas, A., Carrasco, E., Valero, A., Bolívar, A., Posada-Izquierdo, G. D., et  
493 al. (2018). “MicroHibro”: A software tool for predictive microbiology and microbial risk  
494 assessment in foods. *International Journal of Food Microbiology*, *290*, 226–236.  
495 <http://doi.org/10.1016/j.ijfoodmicro.2018.10.007>
- 496 Göransson, M., Nilsson, F., & Jevinger, Å. (2018). Temperature performance and food shelf-

- 497 life accuracy in cold food supply chains – Insights from multiple field studies. *Food*  
498 *Control*, 86, 332–341. <http://doi.org/10.1016/j.foodcont.2017.10.029>
- 499 Hamner, B., Frasco, M., & LeDell, E. (2018). *Metrics*: Evaluation metrics for machine  
500 learning. *R package version 0.1.4*. Available at: [www.r-project.org](http://www.r-project.org).
- 501 Huang, L. (2008). Growth kinetics of *Listeria monocytogenes* in broth and beef  
502 Frankfurters—Determination of lag phase duration and exponential growth rate under  
503 static conditions. *Journal of Food Science*, 73(5), E235–E242.  
504 <http://doi.org/10.1111/j.1750-3841.2008.00785.x>
- 505 Huang, L. (2014). IPMP 2013 – a comprehensive data analysis tool for predictive  
506 microbiology. *International Journal of Food Microbiology*, 171, 100–107.  
507 <http://doi.org/10.1016/j.ijfoodmicro.2013.11.019>
- 508 Huang, L. (2016). Simulation and evaluation of different statistical functions for describing  
509 lag time distributions of a bacterial growth curve. *Microbial Risk Analysis*, 1, 47–55.  
510 <http://doi.org/10.1016/j.mran.2015.08.002>
- 511 Huang, L. (2017a). Dynamic identification of growth and survival kinetic parameters of  
512 microorganisms in foods. *Current Opinion in Food Science*, 14, 85–92.  
513 <http://doi.org/10.1016/j.cofs.2017.01.013>
- 514 Huang, L. (2017b). IPMP Global Fit – A one-step direct data analysis tool for predictive  
515 microbiology. *International Journal of Food Microbiology*, 262, 38–48.  
516 <http://doi.org/10.1016/j.ijfoodmicro.2017.09.010>
- 517 Huang, L., & Hwang, C.-A. (2017). Dynamic analysis of growth of *Salmonella Enteritidis* in  
518 liquid egg whites. *Food Control*, 80, 125–130.

- 519 <http://doi.org/10.1016/j.foodcont.2017.04.044>
- 520 Huang, L., Hwang, C.-A., & Phillips, J. (2011). Evaluating the effect of temperature on  
521 microbial growth rate-The Ratkowsky and a Bělehrádek-type models. *Journal of Food  
522 Science*, 76(8), M547–M557. <http://doi.org/10.1111/j.1750-3841.2011.02345.x>
- 523 Hwang, C.-A., & Huang, L. (2018). Dynamic analysis of competitive growth of *Escherichia  
524 coli* O157:H7 in raw ground beef. *Food Control*, 93, 251–259.  
525 <http://doi.org/10.1016/j.foodcont.2018.06.017>
- 526 Iannetti, L., Salini, R., Sperandii, A. F., Santarelli, G. A., Neri, D., Di Marzio, V., et al.  
527 (2017). Predicting the kinetics of *Listeria monocytogenes* and *Yersinia enterocolitica*  
528 under dynamic growth/death-inducing conditions, in Italian style fresh sausage.  
529 *International Journal of Food Microbiology*, 240, 108–114.  
530 <http://doi.org/10.1016/j.ijfoodmicro.2016.04.026>
- 531 ICMSF, International Commission on Microbiological Specifications for Foods (1996).  
532 *Listeria monocytogenes*. In T. A. Robert, A. C. Baird-Parker, & R. B. Tompkin (Eds.),  
533 *Microorganisms in foods 5: characteristics of microbial pathogens* (pp. 148). London:  
534 Blackie Academic and Professional.
- 535 Koutsoumanis, K. P., & Lianou, A. (2013). Stochasticity in colonial growth dynamics of  
536 individual bacterial cells. *Applied and Environmental Microbiology*, 79(7), 2294–2301.  
537 <http://doi.org/10.1128/AEM.03629-12>
- 538 Koutsoumanis, K. P., Lianou, A., & Gougouli, M. (2016). Last developments in foodborne  
539 pathogens modeling. *Current Opinion in Food Science*, 8, 89–98.  
540 <http://doi.org/10.1016/j.cofs.2016.04.006>

- 541 Li, M., Huang, L., & Yuan, Q. (2017). Growth and survival of *Salmonella* Paratyphi A in  
542 roasted marinated chicken during refrigerated storage: Effect of temperature abuse and  
543 computer simulation for cold chain management. *Food Control*, 74, 17–24.  
544 <http://doi.org/10.1016/j.foodcont.2016.11.023>
- 545 Mafart, P., Couvert, O., Gaillard, S., & Leguérinel, I. (2002). On calculating sterility in  
546 thermal preservation methods: application of the Weibull frequency distribution model.  
547 *International Journal of Food Microbiology*, 72(1-2), 107–113.
- 548 Magalhães, R., Mena, C., Ferreira, V., Silva, J., Almeida, G., Gibbs, P., & Teixeira, P. (2014).  
549 *Listeria monocytogenes*. In: Y. Motarjemi, G. Moy, & E. Todd (Eds), *Encyclopedia of*  
550 *Food Safety* (pp. 450-461). Oxford: Elsevier's Science & Technology.
- 551 Membré, J.-M., & Boué, G. (2018). Quantitative microbiological risk assessment in food  
552 industry: Theory and practical application. *Food Research International*, 106, 1132–  
553 1139. <http://doi.org/10.1016/j.foodres.2017.11.025>
- 554 Ndraha, N., Hsiao, H.-I., Vlajic, J., Yang, M.-F., & Lin, H.-T. V. (2018). Time-temperature  
555 abuse in the food cold chain: Review of issues, challenges, and recommendations. *Food*  
556 *Control*, 89, 12–21. <http://doi.org/10.1016/j.foodcont.2018.01.027>
- 557 Oscar, T. P. (2002). Development and validation of a tertiary simulation model for predicting  
558 the potential growth of *Salmonella typhimurium* on cooked chicken. *International*  
559 *Journal of Food Microbiology*, 76(3), 177–190. [http://doi.org/10.1016/s0168-](http://doi.org/10.1016/s0168-1605(02)00025-9)  
560 [1605\(02\)00025-9](http://doi.org/10.1016/s0168-1605(02)00025-9)
- 561 Peleg, M., & Corradini, M. G. (2011). Microbial growth curves: What the models tell us and  
562 what they cannot. *Critical Reviews in Food Science and Nutrition*, 51(10), 917–945.

- 563 <http://doi.org/10.1080/10408398.2011.570463>
- 564 Plaza-Rodríguez, C., Thoens, C., Falenski, A., Weiser, A. A., Appel, B., Kaesbohrer, A., &  
565 Filter, M. (2015). A strategy to establish food safety model repositories. *International*  
566 *Journal of Food Microbiology*, 204, 81–90.  
567 <http://doi.org/10.1016/j.ijfoodmicro.2015.03.010>
- 568 Pouillot, R., Delignette-Muller, M., & Denis, J. (2017). *mc2d*: tools for two-dimensional  
569 Monte-Carlo simulations. *R package version 0.1-18*. Available at: [www.r-project.org](http://www.r-project.org).
- 570 Press, W. H., Teukolsky, S. A., Vetterling, W. T., & Flannery, B. P. (2007). Chapter 17:  
571 Integration of ordinary differential equations. In: *Numerical Recipes-the Art of Scientific*  
572 *Computing* (pp.899-954). Cambridge: Cambridge University Press.
- 573 Presser, K. A., Ratkowsky, D. A., & Ross, T. (1997). Modelling the growth rate of  
574 *Escherichia coli* as a function of pH and lactic acid concentration. *Applied and*  
575 *Environmental Microbiology*, 63(6), 2355–2360.
- 576 Psomas, A. N., Nychas, G.-J., Haroutounian, S. A., & Skandamis, P. N. (2011). Development  
577 and validation of a tertiary simulation model for predicting the growth of the food  
578 microorganisms under dynamic and static temperature conditions. *Computers and*  
579 *Electronics in Agriculture*, 76(1), 119–129. <http://doi.org/10.1016/j.compag.2011.01.013>
- 580 Ratkowsky, D.A. (2003). Model fitting and uncertainty. In: R. McKellar, & X. Lu (Eds.),  
581 *Modeling Microbial Responses in Foods* (pp. 151–196). Boca Raton: CRC Press.
- 582 Ratkowsky, D. A., Lowry, R. K., McMeekin, T. A., Stokes, A. N., & Chandler, R. E. (1983).  
583 Model for bacterial culture growth rate throughout the entire biokinetic temperature  
584 range. *Journal of Bacteriology*, 154(3), 1222–1226.

- 585 Rawlings, J. O., Pantula, S. G., & Dickey, D. A. (2001). Chapter 7: Model development  
586 variable selection. In: *Applied regression analysis: a research tool* (pp.205-234).  
587 Springer Science & Business Media.
- 588 Ross, T., & McMeekin, T. A. (1994). Predictive microbiology. *International Journal of Food*  
589 *Microbiology*, 23(3-4), 241–264. [http://doi.org/10.1016/0168-1605\(94\)90155-4](http://doi.org/10.1016/0168-1605(94)90155-4)
- 590 Rosso, L., & Robinson, T. P. (2001). A cardinal model to describe the effect of water activity  
591 on the growth of moulds. *International Journal of Food Microbiology*, 63(3), 265–273.
- 592 Rosso, L., Bajard, S., Flandrois, J. P., Lahellec, C., Fournaud, J., & Veit, P. (1996).  
593 Differential growth of *Listeria monocytogenes* at 4 and 8°C: Consequences for the shelf  
594 life of chilled products. *Journal of Food Protection*, 59(9), 944–949.  
595 <http://doi.org/10.4315/0362-028X-59.9.944>
- 596 Rosso, L., Lobry, J. R., & Flandrois, J. P. (1993). An unexpected correlation between cardinal  
597 temperatures of microbial growth highlighted by a new model. *Journal of Theoretical*  
598 *Biology*, 162(4), 447–463. <http://doi.org/10.1006/jtbi.1993.1099>
- 599 Rosso, L., Lobry, J. R., Bajard, S., & Flandrois, J. P. (1995). Convenient model to describe  
600 the combined effects of temperature and pH on microbial growth. *Applied and*  
601 *Environmental Microbiology*, 61(2), 610–616.
- 602 Schwarz, G. (1978). Estimating the dimension of a model. *The Annals of Statistics*, 6(2), 461–  
603 464. <http://doi.org/10.1214/aos/1176344136>
- 604 Tenenhaus-Aziza, F., & Ellouze, M. (2015). Software for predictive microbiology and risk  
605 assessment: A description and comparison of tools presented at the ICPMF8 Software  
606 Fair. *Food Microbiology*, 45(PB), 290–299. <http://doi.org/10.1016/j.fm.2014.06.026>



- 607 USDA, U.S. Department of Agriculture. (2016). Pathogen Modeling Program.  
608 [https://www.ars.usda.gov/northeast-area/wyndmoor-pa/eastern-regional-research-](https://www.ars.usda.gov/northeast-area/wyndmoor-pa/eastern-regional-research-center/residue-chemistry-and-predictive-microbiology-research/docs/pathogen-modeling-program/)  
609 [center/residue-chemistry-and-predictive-microbiology-research/docs/pathogen-](https://www.ars.usda.gov/northeast-area/wyndmoor-pa/eastern-regional-research-center/residue-chemistry-and-predictive-microbiology-research/docs/pathogen-modeling-program/)  
610 [modeling-program/](https://www.ars.usda.gov/northeast-area/wyndmoor-pa/eastern-regional-research-center/residue-chemistry-and-predictive-microbiology-research/docs/pathogen-modeling-program/) Accessed 01 May 2018.
- 611 USDA. (2017). IPMP Dynamic Prediction. [https://www.ars.usda.gov/northeast-](https://www.ars.usda.gov/northeast-area/wyndmoor-pa/eastern-regional-research-center/docs/ipmp-dynamic-prediction/)  
612 [area/wyndmoor-pa/eastern-regional-research-center/docs/ipmp-dynamic-prediction/](https://www.ars.usda.gov/northeast-area/wyndmoor-pa/eastern-regional-research-center/docs/ipmp-dynamic-prediction/)  
613 Accessed 01 May 2018.
- 614 van Boekel, M. A. J. S. (2002). On the use of the Weibull model to describe thermal  
615 inactivation of microbial vegetative cells. *International Journal of Food Microbiology*,  
616 74(1-2), 139–159.
- 617 van Boekel, M. A. J. S., & Zwietering, M. H. (2007). Experimental design, data processing  
618 and model fitting in predictive microbiology. In: S. Brul, S. van Gerwen, M. Zwietering,  
619 (Eds.). *Modeling microorganisms in food* (pp. 38). Woodhead Publishing.
- 620 Van Impe, J. F., Nicolai, B. M., Martens, T., De Baerdemaeker, J., & Vandewalle, J. (1992).  
621 Dynamic mathematical model to predict microbial growth and inactivation during food  
622 processing. *Applied and Environmental Microbiology*, 58(9), 2901–2909.
- 623 Vimont, A., Vernozy-Rozand, C., Montet, M. P., Lazizzera, C., Bavai, C., & Delignette-  
624 Muller, M. L. (2006). Modeling and predicting the simultaneous growth of *Escherichia*  
625 *coli* O157:H7 and ground beef background microflora for various enrichment protocols.  
626 *Applied and Environmental Microbiology*, 72(1), 261–268.  
627 <http://doi.org/10.1128/AEM.72.1.261-268.2006>
- 628 Wang, X., Devlieghere, F., Geeraerd, A., & Uyttendaele, M. (2017). Thermal inactivation and  
629 sublethal injury kinetics of *Salmonella enterica* and *Listeria monocytogenes* in broth

630 versus agar surface. *International Journal of Food Microbiology*, 243, 70–77.

631 <http://doi.org/10.1016/j.ijfoodmicro.2016.12.008>

632 Whiting, R. C., & Buchanan, R. L. (1993). A classification of models in predictive  
633 microbiology. *Food Microbiology*, 10, 175–177.

634 WHO, World Health Organization (2015). WHO estimates of the global burden of foodborne  
635 diseases: foodborne disease burden epidemiology reference group 2007-2015.  
636 <http://apps.who.int/iris/handle/10665/199350/> Accessed 01 May 2018.

637 Wickham, H., Chang, W., Henry, L., Pedersen, T.L., Takahashi, K., Wilke, C., & Woo, K.  
638 (2019). *ggplot2*: Create elegant data visualisations using the grammar of graphics. *R*  
639 *package version 3.1.1*. Available at: [www.r-project.org](http://www.r-project.org).

640 Zwietering, M. H., Jongenburger, I., Rombouts, F. M., & van 't Riet, K. (1990). Modeling of  
641 the bacterial growth curve. *Applied and Environmental Microbiology*, 56(6), 1875–1881.

642

## Tables

Table 1. Primary models included in Microrisk Lab

| Name                                       | Formula                                                                                                                                                                                                                                                                 |
|--------------------------------------------|-------------------------------------------------------------------------------------------------------------------------------------------------------------------------------------------------------------------------------------------------------------------------|
| <b>Explicit equations for growth*</b>      |                                                                                                                                                                                                                                                                         |
| Complete Gompertz model <sup>1</sup>       | $Y(t) = Y_0 + (Y_{max} - Y_0) \exp \left\{ -\exp \left[ \frac{2.71 \mu_{max} (t_{lag} - t)}{Y_{max} - Y_0} + 1 \right] \right\}$                                                                                                                                        |
| Complete Baranyi model <sup>2</sup>        | $\begin{cases} Y(t) = Y_0 + \mu_{max} A(t) - \ln \left[ 1 + \frac{\exp(\mu_{max} A(t)) - 1}{\exp(Y_{max} - Y_0)} \right] \\ A(t) \\ = t + \frac{1}{\mu_{max}} [\ln \exp(-\mu_{max} t) + \exp(-\mu_{max} t_{lag}) - \exp(-\mu_{max} t - \mu_{max} t_{lag})] \end{cases}$ |
| Complete Buchanan model <sup>3</sup>       | $\begin{cases} y(t) = y_0, & t < t_{lag} \\ y(t) = y_0 + \frac{\mu_{max}}{\ln 10} (t - t_{lag}), & t_{lag} \leq t < t_{max} \\ y(t) = y_{max}, & t \geq t_{max} \end{cases}$                                                                                            |
| Lag-logistic model <sup>4</sup>            | $\begin{cases} Y(t) = Y_0, & t < t_{lag} \\ Y(t) = Y_{max} - \ln \{ 1 + [\exp(Y_{max} - Y_0) - 1] \exp[-\mu_{max} (t - t_{lag})] \}, & t \geq t_{lag} \end{cases}$                                                                                                      |
| Complete Huang model <sup>5</sup>          | $\begin{cases} Y(t) = Y_0 + Y_{max} - \ln \{ \exp(Y_0) + [\exp(Y_{max}) - \exp(Y_0)] \exp(-\mu_{max} B(t)) \} \\ B(t) = t + \frac{1}{4} \ln \frac{1 + \exp[-4(t - t_{lag})]}{1 - \exp(4t_{lag})} \end{cases}$                                                           |
| Logistic model <sup>6</sup>                | $Y(t) = Y_0 + Y_{max} - \ln \{ \exp(Y_0) + [\exp(Y_{max}) - \exp(Y_0)] \exp(-\mu_{max} t) \}$                                                                                                                                                                           |
| No lag Buchanan model <sup>7</sup>         | $\begin{cases} y(t) = y_0 + \frac{\mu_{max}}{\ln 10} t, & t < t_{max} \\ y(t) = y_{max}, & t \geq t_{max} \end{cases}$                                                                                                                                                  |
| Reduced Baranyi model <sup>8</sup>         | $Y(t) = Y_0 + \mu_{max} t + \ln [\exp(-\mu_{max} t) + \exp(-\mu_{max} t_{lag}) - \exp(-\mu_{max} t - \mu_{max} t_{lag})]$                                                                                                                                               |
| Reduced Buchanan model <sup>9</sup>        | $\begin{cases} y(t) = y_0, & t < t_{lag} \\ y(t) = y_0 + \frac{\mu_{max}}{\ln 10} (t - t_{lag}), & t \geq t_{lag} \end{cases}$                                                                                                                                          |
| Reduced Huang model <sup>10</sup>          | $Y(t) = Y_0 + \mu_{max} t + \frac{1}{4} \mu_{max} \ln \frac{1 + \exp[-4(t - t_{lag})]}{1 - \exp(4t_{lag})}$                                                                                                                                                             |
| Linear model                               | $Y(t) = Y_0 + \mu_{max} t$                                                                                                                                                                                                                                              |
| <b>Explicit equations for inactivation</b> |                                                                                                                                                                                                                                                                         |
| Completed Geeraerd model <sup>11</sup>     | $y(t) = y_{res} + \log_{10} \left[ \frac{(10^{y_0 - y_{res}} - 1) \exp(k_{max} S_l)}{\exp(k_{max} t) + \exp(k_{max} S_l) - 1} + 1 \right]$                                                                                                                              |
| Three-phase model <sup>12</sup>            | $\begin{cases} y(t) = y_0, & t < S_l \\ y(t) = y_0 + \frac{k_{max}}{\ln 10} (t - S_l), & S_l \leq t < S_t \\ y(t) = y_{res}, & t \geq S_t \end{cases}$                                                                                                                  |
| Weibull-tail model <sup>13</sup>           | $y(t) = y_{res} + \log_{10} \left[ (10^{y_0 - y_{res}} - 1) 10^{-\left(\frac{t}{\delta}\right)^p} + 1 \right]$                                                                                                                                                          |
| No shoulder Geeraerd model <sup>14</sup>   | $y(t) = y_{res} + \log_{10} \{ (10^{y_0 - y_{res}} - 1) \exp(k_{max} t) + 1 \}$                                                                                                                                                                                         |
| No shoulder two-phase model <sup>15</sup>  | $\begin{cases} y(t) = y_0 + \frac{k_{max}}{\ln 10} t, & t < S_t \\ y(t) = y_{res}, & t \geq S_t \end{cases}$                                                                                                                                                            |
| No tail Geeraerd model <sup>16</sup>       | $y(t) = y_0 + \frac{k_{max} t}{\ln 10} + \log_{10} \left\{ \frac{\exp(k_{max} S_l)}{1 + [\exp(k_{max} S_l) - 1] \exp(k_{max} t)} \right\}$                                                                                                                              |
| No tail two-phase model <sup>17</sup>      | $\begin{cases} y(t) = y_0, & t < S_l \\ y(t) = y_0 + \frac{k_{max}}{\ln 10} (t - S_l), & t \geq S_l \end{cases}$                                                                                                                                                        |

Weibull model <sup>18</sup> 
$$y(t) = y_0 - \left(\frac{t}{\delta}\right)^p$$

Bigelow model <sup>19</sup> 
$$y(t) = y_0 - \frac{t}{D}$$

---

<sup>1</sup>Zwietering, Jongenburger, Rombouts, & van 't Riet, 1990; <sup>2/8</sup> Baranyi & Roberts, 1995; <sup>3/7/9</sup> Buchanan, Whiting, & Damert, 1997; <sup>4</sup>Rosso et al., 1996; <sup>5/6/10</sup> Huang, 2008; <sup>11/14/16</sup> Geeraerd, Valdramidis, & Van Impe, 2000; <sup>12/15/17</sup> Buchanan & Golden, 1995; <sup>13</sup> Albert & Mafart, 2005; <sup>18</sup> van Boekel, 2002; <sup>19</sup> Bigelow, 1921.

\* Reduced model is the model without asymptote.

Table 2. Secondary models for  $\mu_{max}$  included in Microrisk Lab

| Name                                            | Formula                                                                                                                                                          |
|-------------------------------------------------|------------------------------------------------------------------------------------------------------------------------------------------------------------------|
| <b>Temperature models</b>                       |                                                                                                                                                                  |
| Suboptimal square-root model <sup>1</sup>       | $\mu_{max} = [a(T - T_{min})]^2$                                                                                                                                 |
| Full square-root model <sup>2</sup>             | $\mu_{max} = \langle a(T - T_{min})\{1 - \exp[b(T - T_{max})]\} \rangle^2$                                                                                       |
| Suboptimal Huang square-root model <sup>3</sup> | $\mu_{max} = [a(T - T_{min})^{0.75}]^2$                                                                                                                          |
| Full Huang square-root model <sup>4</sup>       | $\mu_{max} = \langle a(T - T_{min})^{0.75}\{1 - \exp[b(T - T_{max})]\} \rangle^2$                                                                                |
| Cardinal parameter model <sup>5</sup>           | $\mu_{max} = \frac{\mu_{opt}(T - T_{max})(T - T_{min})^2}{[(T_{opt} - T_{min})(T - T_{opt}) - (T_{opt} - T_{max})(T_{opt} + T_{min} - 2T)](T_{opt} - T_{min})}$  |
| <b>pH models</b>                                |                                                                                                                                                                  |
| Cardinal 3-parameter model <sup>6</sup>         | $\mu_{max} = \frac{\mu_{opt}(pH - pH_{min})[pH - (2pH_{opt} - pH_{min})]}{(pH - pH_{min})[pH - (2pH_{opt} - pH_{min})] - (pH - pH_{opt})^2}$                     |
| Cardinal 4-parameter model <sup>7</sup>         | $\mu_{max} = \frac{\mu_{opt}(pH - pH_{min})(pH - pH_{max})}{(pH - pH_{min})(pH - pH_{max}) - (pH - pH_{opt})^2}$                                                 |
| Quasi-mechanistic model <sup>8</sup>            | $\mu_{max} = \mu_{opt}(1 - 10^{pH_{min} - pH})$                                                                                                                  |
| <b>Water activity models</b>                    |                                                                                                                                                                  |
| Cardinal 2-parameter model <sup>9</sup>         | $\mu_{max} = \frac{\mu_{opt}(aw - aw_{min})^2}{(1 - aw_{min})^2}$                                                                                                |
| Cardinal 3-parameter model <sup>10</sup>        | $\mu_{max} = \frac{\mu_{opt}(aw - 1)(aw - aw_{min})^2}{(aw_{opt} - aw_{min})[(aw_{opt} - aw_{min})(aw - aw_{opt}) - (aw_{opt} - 1)(aw_{opt} + aw_{min} - 2aw)]}$ |

<sup>1/2</sup> Ratkowsky et al., 1983; <sup>3/4</sup> Huang & Hwang, 2011; <sup>5</sup> Rosso, Lobry, & Flandrois, 1993; <sup>6/7</sup> Rosso, Lobry, Bajard, & Flandrois, 1995; <sup>8</sup> Presser, Ratkowsky, & Ross, 1997; <sup>9/10</sup> Rosso & Robinson, 2001.

Table 3. Complex models included in Microrisk Lab

| Name                                                    | Formula                                                                                                                                                                                                                                                                                                                                                                                                                                                        |
|---------------------------------------------------------|----------------------------------------------------------------------------------------------------------------------------------------------------------------------------------------------------------------------------------------------------------------------------------------------------------------------------------------------------------------------------------------------------------------------------------------------------------------|
| <b>Two flora competition growth models*</b>             |                                                                                                                                                                                                                                                                                                                                                                                                                                                                |
| Jameson - No lag Buchanan model <sup>1</sup>            | $\begin{cases} y_1(t) = \begin{cases} y_1 + \frac{\mu_{max1}}{\ln 10} t, & t < t_{max} \\ y_1 + \frac{\mu_{max1}}{\ln 10} t_{max}, & t \geq t_{max} \end{cases} \\ y_2(t) = \begin{cases} y_2 + \frac{\mu_{max2}}{\ln 10} t, & t < t_{max} \\ y_2 + \frac{\mu_{max2}}{\ln 10} t_{max}, & t \geq t_{max} \end{cases} \end{cases}$                                                                                                                               |
| Jameson - Buchanan model <sup>2</sup>                   | $\begin{cases} y_1(t) = \begin{cases} y_1, & t < t_{lag1} \\ y_1 + \frac{\mu_{max1}}{\ln 10} (t - t_{lag1}), & t_{lag1} \leq t < t_{max} \\ y_1 + \frac{\mu_{max1}}{\ln 10} (t_{max} - t_{lag1}), & t \geq t_{max} \end{cases} \\ y_2(t) = \begin{cases} y_2, & t < t_{lag2} \\ y_2 + \frac{\mu_{max2}}{\ln 10} (t - t_{lag2}), & t_{lag2} \leq t < t_{max} \\ y_2 + \frac{\mu_{max2}}{\ln 10} (t_{max} - t_{lag2}), & t \geq t_{max} \end{cases} \end{cases}$ |
| <b>Ordinary differential equations for growth</b>       |                                                                                                                                                                                                                                                                                                                                                                                                                                                                |
| Baranyi - Cardinal parameter model <sup>3</sup>         | $\begin{cases} \frac{dY}{dt} = \mu_{max} \left[ \frac{1}{1 + \exp(-Q)} \right] [1 - \exp(Y - Y_{max})] \\ \frac{dQ}{dt} = \mu_{max} \\ Q = \ln \frac{q}{1-q} \\ Y(0) = Y_0 \\ q(0) = q_0 \\ \mu_{max} = \frac{\mu_{opt}(T - T_{max})(T - T_{min})^2}{[(T_{opt} - T_{min})(T - T_{opt}) - (T_{opt} - T_{max})(T_{opt} + T_{min} - 2T)](T_{opt} - T_{min})} \end{cases}$                                                                                         |
| Huang - Cardinal parameter model <sup>4/5</sup>         | $\begin{cases} \frac{dY}{dt} = \mu_{max} \left[ \frac{1}{1 + \exp(-4(t - t_{lag}))} \right] [1 - \exp(Y - Y_{max})] \\ t_{lag} = \frac{\exp(A)}{\mu_{max}^m} \\ Y(0) = Y_0 \\ \mu_{max} = \frac{\mu_{opt}(T - T_{max})(T - T_{min})^2}{[(T_{opt} - T_{min})(T - T_{opt}) - (T_{opt} - T_{max})(T_{opt} + T_{min} - 2T)](T_{opt} - T_{min})} \end{cases}$                                                                                                       |
| <b>Ordinary differential equations for inactivation</b> |                                                                                                                                                                                                                                                                                                                                                                                                                                                                |
| Dynamic Weibull model <sup>7</sup>                      | $\frac{dy}{dt} = -p \left( \frac{T - T_{ref}}{\delta_{ref}} \right)^p t^{p-1}, y(0) = y_0$                                                                                                                                                                                                                                                                                                                                                                     |
| Dynamic Bigelow model <sup>8</sup>                      | $\frac{dy}{dt} = -\frac{1}{D_{ref}} 10^{\frac{T - T_{ref}}{z}}, y(0) = y_0$                                                                                                                                                                                                                                                                                                                                                                                    |

\* The inferior number 1 or 2 in competition growth models represent the flora type;

<sup>1/2</sup> Vimont et al., 2006; <sup>3/4/6</sup> Huang, 2017a; <sup>5</sup> Hwang & Huang, 2018; <sup>7</sup> Mafart et al, 2002; <sup>8</sup> Van Impe et al., 1992.



Table 4 Comparison on static growth fitting results of Microrisk Lab and DMFit (Complete Baranyi model)

|                             | <b>Microrisk Lab</b>            | <b>Online DMFit</b> | <b>Excel DMFit</b> |               |               |
|-----------------------------|---------------------------------|---------------------|--------------------|---------------|---------------|
| <b>Curvature paramters</b>  | -                               | Default             | nCurv=1 (Default)  | nCurv=1.5     | nCurv=2       |
| <b>Parameter estimation</b> |                                 |                     |                    |               |               |
| Parameters                  | Est. (SE)*<br>(95% CI) **       | Est. (SE)*          | Est. (SE)*         | Est. (SE)*    | Est. (SE)*    |
| $y_0$ (log10 CFU/g)         | 3.85 (0.12)<br>(3.53, 4.17)     | 3.84 (0.12)         | 3.82 (-)           | 3.82 (-)      | 3.86 (-)      |
| $y_{max}$ (log10 CFU/g)     | 9.41 (0.09)<br>(9.16, 9.66)     | 9.44 (0.10)         | 9.46 (0.12)        | 9.46 (0.11)   | 9.46 (0.10)   |
| $t_{lag}$ (h)               | 38.09 (10.36)<br>(9.32, 66.86)  | 42.72 (11.35)       | 38.89 (16.08)      | 38.66 (11.69) | 38.01 (10.10) |
| $\mu_{max}$ (1/h)           | 0.044 (0.002)<br>(0.038, 0.051) | 0.046 (0.003)       | 0.045 (0.004)      | 0.045 (0.004) | 0.044 (0.002) |
| <b>Model evaluation</b>     |                                 |                     |                    |               |               |
| RSS                         | 0.1239                          | -                   | -                  | -             | -             |
| MSE                         | 0.0310                          | -                   | -                  | -             | -             |
| RMSE                        | 0.1760                          | -                   | -                  | -             | -             |
| AIC                         | 4.0349                          | -                   | -                  | -             | -             |
| AICc                        | 9.3683                          | -                   | -                  | -             | -             |
| BIC                         | 4.3527                          | -                   | -                  | -             | -             |
| Adjusted R <sup>2</sup>     | 0.9976***                       | 0.997               | 0.9970             | 0.9974        | 0.9975        |

\* Est.: Estimation; SE: Standard error.

\*\* 95%CI: lower and upper 95% confidence intervals.

\*\*\* Results no show in Microrisk Lab



Table 5 Comparison on inactivation fitting results of Microrisk Lab and GInaFiT (No tail Geeraerd model)

|                                 | <b>Microrisk Lab</b>    |       | <b>GInaFiT 1.7</b> |      |
|---------------------------------|-------------------------|-------|--------------------|------|
| <b>Parameter estimation*</b>    |                         |       |                    |      |
| Parameters                      | Est.<br>(95% CI) **     | SE    | Est.               | SE   |
| $y_0$ (log <sub>10</sub> CFU/g) | 9.01<br>(8.83, 9.19)    | 0.08  | 9.01               | 0.08 |
| $S_l$ (min)                     | 0.43<br>(0.30, 0.57)    | 0.06  | 0.43               | 0.06 |
| $k_{max}$ (1/min)               | 5.581<br>(5.106, 6.057) | 0.213 | 5.58               | 0.21 |
| <b>Model evaluation</b>         |                         |       |                    |      |
| RSS                             | 0.1320                  |       | 0.1320             |      |
| MSE                             | 0.0132                  |       | 0.0132             |      |
| RMSE                            | 0.1149                  |       | 0.1149             |      |
| AIC                             | -16.7812                |       | -                  |      |
| AICc                            | -20.1145                |       | -                  |      |
| BIC                             | -15.0864                |       | -                  |      |
| R <sup>2</sup>                  | -                       |       | 0.9938             |      |
| Adjusted R <sup>2</sup>         | -                       |       | 0.9926             |      |

\* Est.: Estimation; SE: Standard error.

\*\* 95%CI: lower and upper 95% confidence intervals.

Table 6 Comparison on secondary model fitting results of Microrisk Lab and IPMP 2013 (Cardinal parameter model)

|                              | <b>Microrisk Lab</b>    |       | <b>IPMP 2013</b>        |       | <b>GraphPad Prism 7.0</b> |       |
|------------------------------|-------------------------|-------|-------------------------|-------|---------------------------|-------|
| <b>Parameter estimation*</b> |                         |       |                         |       |                           |       |
| Parameters                   | Est.<br>(95% CI) **     | SE    | Est.<br>(95% CI) **     | SE    | Est.<br>(95% CI) **       | SE    |
| $\mu_{opt}$ (1/h)            | 1.620<br>(1.558, 1.682) | 0.029 | 1.621<br>(1.559, 1.682) | 0.029 | 1.621<br>(1.559, 1.683)   | 0.029 |
| $T_{opt}$ (°C)               | 39.7<br>(38.9, 40.5)    | 0.4   | 39.8<br>(39.0, 40.6)    | 0.4   | 39.8<br>(38.9, 40.6)      | 0.4   |
| $T_{min}$ (°C)               | 5.6<br>(3.1, 8.2)       | 1.2   | 5.6<br>(3.0, 8.1)       | 1.2   | 5.6<br>(2.9, 8.1)         | 1.2   |
| $T_{max}$ (°C)               | 49.6<br>(48.9, 50.3)    | 0.3   | 49.6<br>(48.9, 50.3)    | 0.3   | 49.6<br>(49.0, 50.5)      | 0.3   |
| <b>Model evaluation</b>      |                         |       |                         |       |                           |       |
| RSS                          | 0.0816                  |       | 0.0810                  |       | 0.0810                    |       |
| MSE                          | 0.0048                  |       | 0.0050                  |       | -                         |       |
| RMSE                         | 0.0693                  |       | 0.0690                  |       | 0.0690                    |       |
| AIC                          | -48.9750                |       | -102.7230               |       | -                         |       |
| AICc                         | -54.4750                |       | -                       |       | -                         |       |
| BIC                          | -44.7969                |       | -                       |       | -                         |       |
| R <sup>2</sup>               | -                       |       | -                       |       | 0.9876                    |       |

\* Est.: Estimation; SE: Standard error.

\*\* 95% CI: lower and upper 95% confidence intervals.

Table 7 Non-isothermal growth model fitting results of Microrisk Lab

| Baranyi-Cardinal parameter model |          |                            |        | Huang-Cardinal parameter model |          |                         |       |
|----------------------------------|----------|----------------------------|--------|--------------------------------|----------|-------------------------|-------|
| <b>Parameter estimation*</b>     |          |                            |        |                                |          |                         |       |
| Parameters                       | Int.     | Est.<br>(95% CI) **        | SE     | Parameters                     | Int.     | Est.<br>(95% CI) **     | SE    |
| $y_0$ (log10 CFU/g)              | -        | 3.39<br>(3.36, 3.43)       | 0.02   | $y_0$ (log10 CFU/g)            | -        | 3.45<br>(3.41, 3.50)    | 0.02  |
| $y_{max}$ (log10 CFU/g)          | -        | 8.21<br>(8.18, 8.25)       | 0.02   | $y_{max}$ (log10 CFU/g)        | -        | 8.21<br>(8.16, 8.27)    | 0.03  |
| $\mu_{opt}$ (1/h)                | 1.000    | 1.065<br>(0.854, 1.276)    | 0.096  | $\mu_{opt}$ (-h)               | 1.000    | 1.242<br>(0.825, 1.659) | 0.187 |
| $T_{opt}$ (°C)                   | 37.0     | 36.4<br>(35.4, 37.5)       | 0.5    | $T_{opt}$ (°C)                 | 37.0     | 38.0<br>(33.5, 42.4)    | 2.0   |
| $T_{min}$ (°C)                   | 0.0      | -1.1<br>(-2.6, 0.5)        | 0.7    | $T_{min}$ (°C)                 | 0.0      | -2.8<br>(-7.4, -1.8)    | 2.1   |
| $T_{max}$ (°C)                   | 45.0     | 42.4<br>(38.4, 46.4)       | 1.8    | $T_{max}$ (°C)                 | 45.0     | 40.3<br>(38.7, 41.9)    | 0.7   |
| $q_0$                            | 1.0000   | 0.0244<br>(0.0167, 0.0321) | 0.0035 | $A$                            | 1.00     | 1.91<br>(1.84, 1.99)    | 0.04  |
|                                  |          |                            |        | $m$                            | 1.00     | 0.33<br>(0.17, 0.48)    | 0.07  |
| <b>Step size (h)</b>             |          |                            |        | 0.1                            |          |                         |       |
| <b>Model evaluation</b>          |          |                            |        |                                |          |                         |       |
| RSS                              | 0.0071   |                            |        |                                | 0.0155   |                         |       |
| MSE                              | 0.0006   |                            |        |                                | 0.0016   |                         |       |
| RMSE                             | 0.0253   |                            |        |                                | 0.0394   |                         |       |
| AIC                              | -46.0602 |                            |        |                                | -29.8674 |                         |       |
| AICc                             | -48.8602 |                            |        |                                | -29.8674 |                         |       |
| BIC                              | -39.8276 |                            |        |                                | -22.7444 |                         |       |

\* Int.: Initial guess; Est.: Estimation; SE: Standard error.

\*\* 95% CI: lower and upper 95% confidence intervals.

Table 8 Comparison on non-isothermal inactivation fitting results of Microrisk Lab and Bioinactivation FE

(Dynamic Bigelow model)

|                                | <b>Microrisk Lab</b> |      | <b>Bioinactivation FE</b>         |      |
|--------------------------------|----------------------|------|-----------------------------------|------|
| <b>Initial parameter guess</b> |                      |      |                                   |      |
| Parameters                     | Initial estimate     |      | Initial estimate                  |      |
| $T_{ref}$ (°C)                 | 120 (fixed)          |      | 120 (fixed)                       |      |
| $D_{ref}$ (min)                | 10                   |      | 10                                |      |
| $z$ (°C)                       | 8                    |      | 8                                 |      |
| $y_0$ (log10 CFU/g)            | -                    |      | 6                                 |      |
| <b>Parameter estimation*</b>   |                      |      |                                   |      |
|                                | Numerical solution   |      | Analytic solution (nlr algorithm) |      |
| Parameters                     | Est.<br>(95% CI) **  | SE   | Est.<br>(95% CI) **               | SE   |
| $D_{ref}$ (min)                | 5.63<br>(4.12, 7.14) | 0.72 | 5.65<br>(4.12, 7.17)              | 0.72 |
| $z$ (°C)                       | 6.67<br>(4.72, 8.63) | 0.92 | 6.65<br>(4.70, 8.60)              | 0.92 |
| $y_0$ (log10 CFU/g)            | 5.78<br>(5.69, 5.87) | 0.04 | 5.78<br>(5.69, 5.87)              | 0.04 |
| <b>Model evaluation</b>        |                      |      |                                   |      |
| RSS                            | 0.1737               |      | -                                 |      |
| MSE                            | 0.0102               |      | 0.01                              |      |
| RMSE                           | 0.1011               |      | 0.10                              |      |
| AIC                            | -32.1667             |      | -27.18                            |      |
| AICc                           | -36.6667             |      | -25.68                            |      |
| BIC                            | -29.1795             |      | -24.20                            |      |

\* Est.: Estimation; SE: Standard error;

\*\* 95% CI: lower and upper 95% confidence intervals.

Table 9 Stochastic growth simulation settings for Microrisk Lab and Palisade @RISK (Buchanan model)

| Parameters              | Microrisk Lab      | Palisade @RISK for Excel |
|-------------------------|--------------------|--------------------------|
| $y_0$ (log10 CFU/g)     | Distribution       | Normal                   |
|                         | Mean               | 0                        |
|                         | Standard deviation | 0                        |
| $y_{max}$ (log10 CFU/g) | Distribution       | Normal                   |
|                         | Mean               | 8                        |
|                         | Standard deviation | 0                        |
| $t_{lag}$ (h)           | Distribution       | Lognormal                |
|                         | Mean               | 3.355                    |
|                         | Standard deviation | 0.896                    |
|                         | Shift              | -1.628                   |
| $\mu_{max}$ (1/h)       | Distribution       | Logistic                 |
|                         | Mean               | 0.754                    |
|                         | Standard deviation | 0.024                    |
| $t$ (h)                 | Distribution       | Uniform                  |
|                         | Maximum            | 0                        |
|                         | Minimum            | 8                        |

## Figures (Color should be used)

**Fig. 1** Overview of the layout of Microrisk Lab and its visual interface on different internet-connected devices.

**Fig. 2** The structural framework and workflow of Microrisk Lab.

**Fig. 3** The fitted curve of (A) Case I with the ‘Complete Baranyi model’, (B) Case II with the ‘No tail Geeraerd model’, and (C) Case III with the ‘Cardinal parameter model’ downloaded from Microrisk Lab. (The blue dot represents the observed bacterial count, and the origin line represents the fitted curve.)

**Fig. 4** The fitted curve of Case IV with (A) the Baranyi-Cardinal parameter model and (B) the Huang-Cardinal parameter model downloaded from Microrisk Lab. (The blue dot represents the observed bacterial count, and the origin line represents the fitted curve.)

**Fig. 5** The fitted curve of Case V with the Dynamic Bigelow model downloaded from Microrisk Lab. (The blue dot represents the observed bacterial count, and the origin line represents the fitted curve.)

**Fig. 6** Monte-Carlo simulation of 1 cell growth with 10, 000 iterations in (A) Microrisk Lab, and (B) @RISK for Excel (adapted from Fig.7 of Koutsoumanis, & Lianou, 2013). (C) Simulated distribution of the maximum specific growth rate and final bacterial count. (D) Tornado graph of the sensitivity analysis between model variables and bacterial counts.

**Fig. 1**

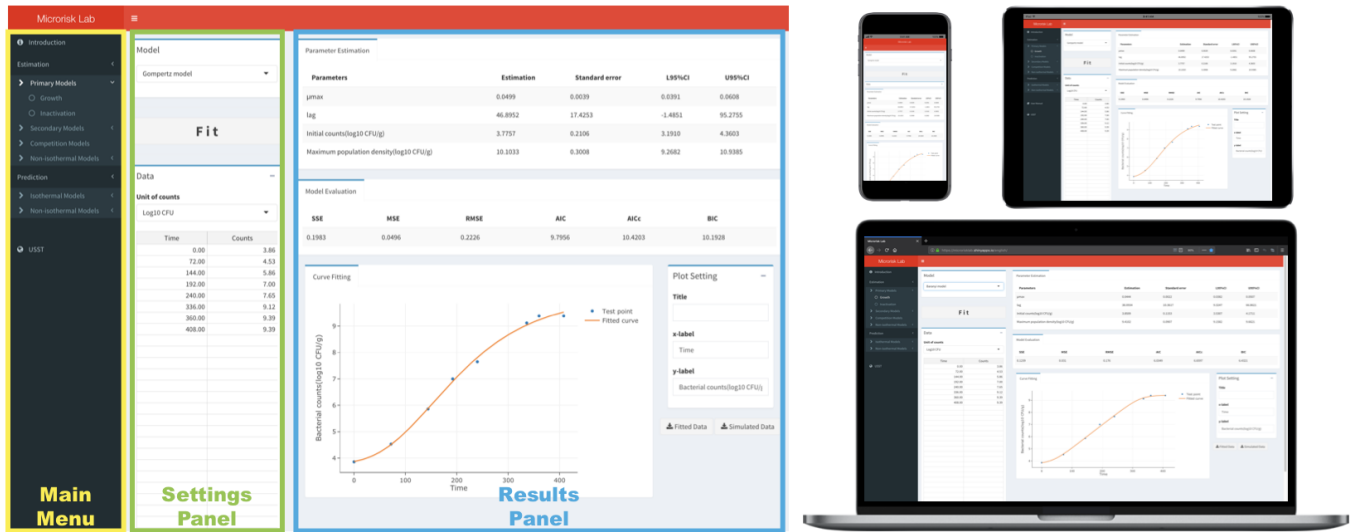

**Fig. 2**

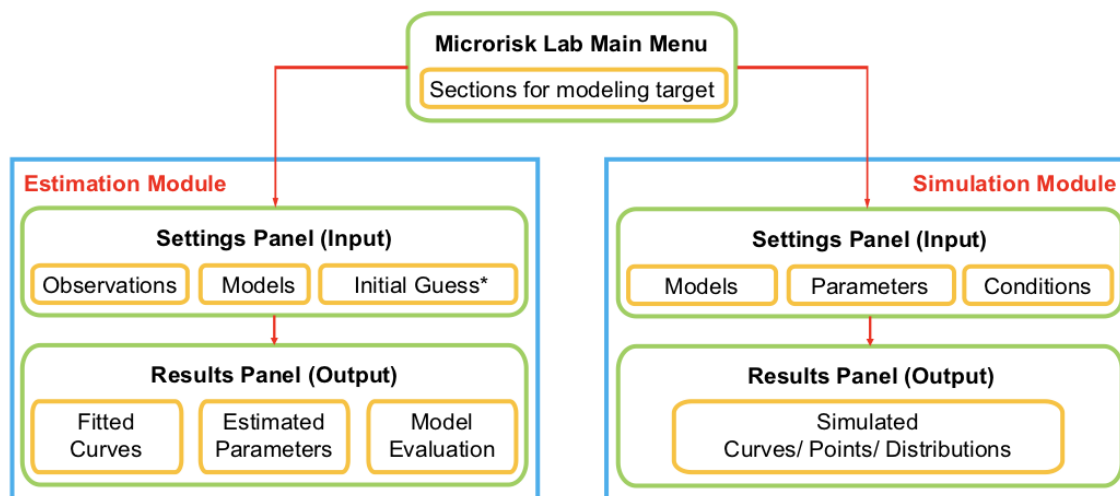

\*Only in the regression under non-isothermal conditions.



**Fig. 3**

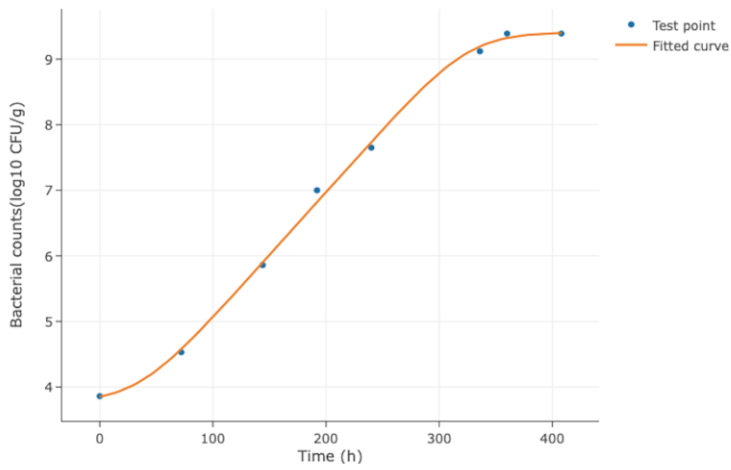

**(A)**

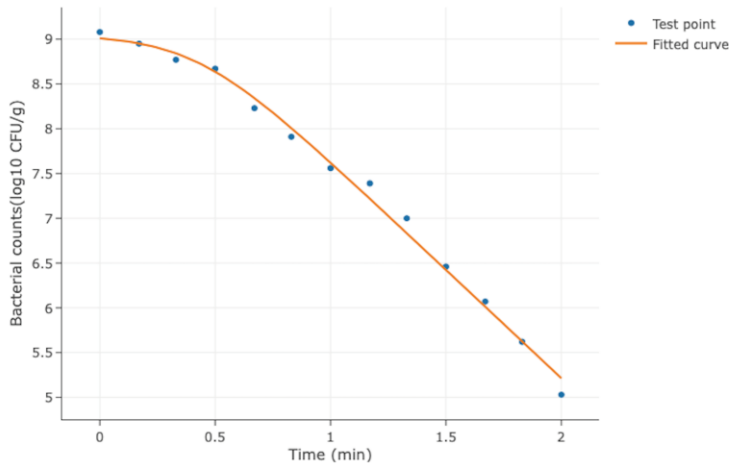

**(B)**

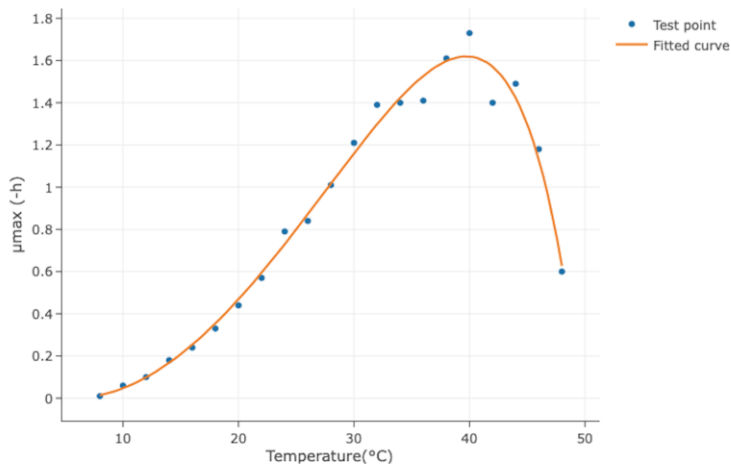

**(C)**

**Fig. 4**

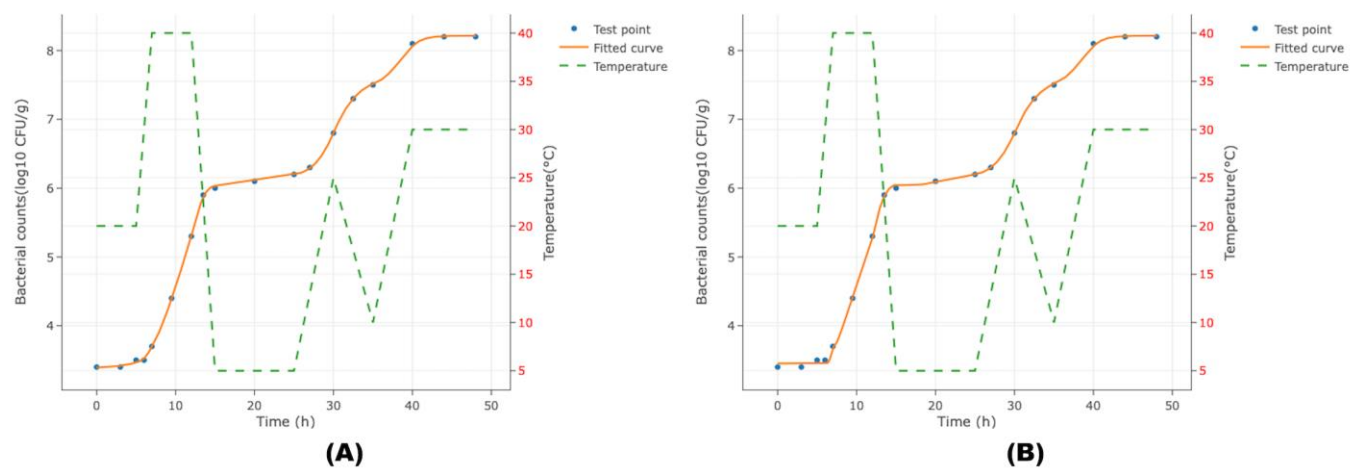

**Fig. 5**

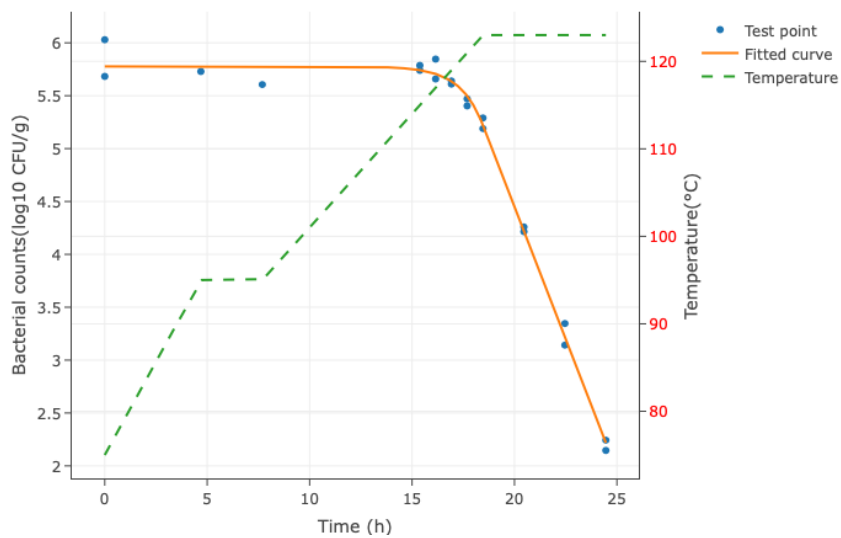

**Fig. 6**

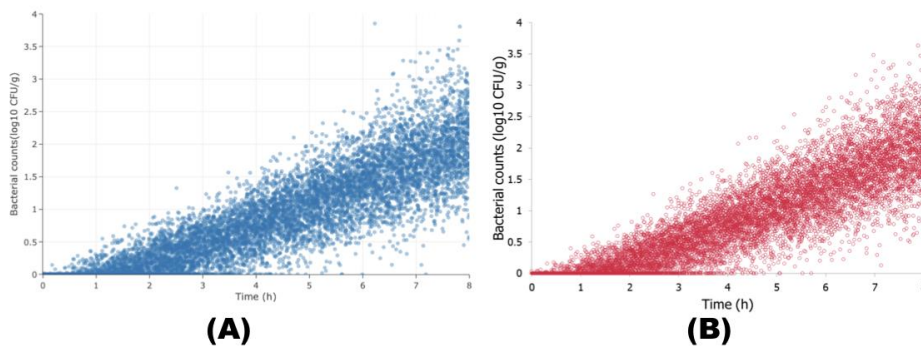

**Probability density of  $\mu_{max}$  and final counts**

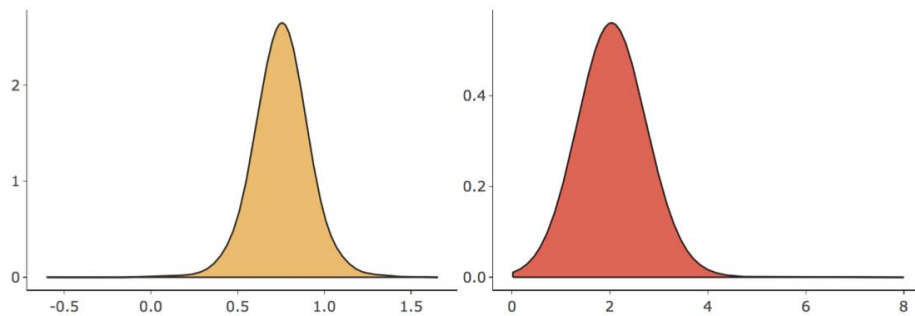

| Parameters  | Mean | Standard deviation |
|-------------|------|--------------------|
| $\mu_{max}$ | 0.75 | 0.16               |
| y-final     | 2.04 | 0.52               |

**(C)**

**Pearson correlation between associated parameters and bacterial counts**

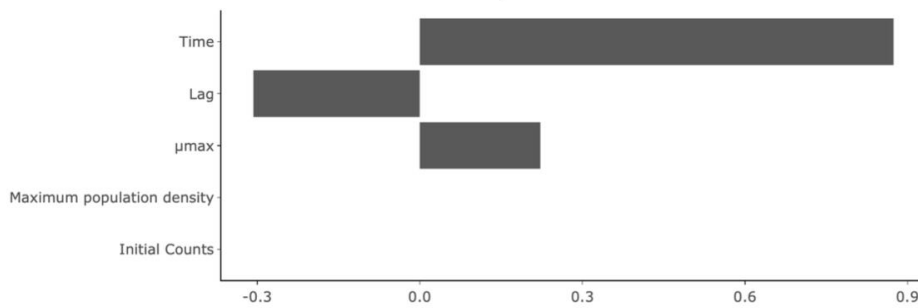

**(D)**
